# Supplementary material for: A single Spanish version of maternal and paternal postnatal attachment scales: validation and conceptual analysis
Source: PeerJ. 2018 Nov 30;6:e5980. doi: 10.7717/peerj.5980 (PMC6276590; doi:10.7717/peerj.5980)
Supplement: Supplemental Information 6 [file peerj-06-5980-s006.pdf]

## **POSTNATAL BONDING SCALE (PBS)**

En las siguientes preguntas, por favor elije la opción que mejor describa tus sentimientos durante el cuidado del bebé.

### **1. Cuando estoy cuidando al bebé, me siento fastidiado/a o irritado/a:**

- ☐ Muy frecuentemente.
- ☐ Frecuentemente.
- ☐ Ocasionalmente.
- ☐ Muy raramente.
- ☐ Nunca.

### **2. Cuando estoy cuidando al bebé siento que se está portando mal a propósito o intentando fastidiarme:**

- ☐ Muy frecuentemente.
- ☐ Frecuentemente.
- ☐ Ocasionalmente.
- ☐ Muy raramente.
- ☐ Nunca.

### **3. En las últimas dos semanas, podría describir mis sentimientos hacia el bebé como:**

- ☐ Desagrado.
- ☐ Falta de sentimientos intensos hacia el bebé.
- ☐ Ligero cariño.
- ☐ Cariño moderado.
- ☐ Cariño intenso.

**4. Respecto a mi relación con el bebé, en general:**

- ☐ Me siento muy culpable por no implicarme más.
- ☐ Me siento bastante culpable por no implicarme más.
- ☐ Me siento moderadamente culpable por no implicarme más.
- ☐ Me siento ligeramente culpable por no implicarme más.
- ☐ No me siento nada culpable por no implicarme más.

**5. Cuando estoy con el bebé y otras personas están presentes, me siento orgulloso/a de él/ella:**

- ☐ Muy frecuentemente.
- ☐ Frecuentemente.
- ☐ Ocasionalmente.
- ☐ Muy raramente.
- ☐ Nunca.

**6. Cuando no tengo más remedio que dejar al bebé:**

- ☐ Me cuesta mucho irme.
- ☐ Me cuesta bastante irme.
- ☐ Me cuesta algo irme.
- ☐ Me cuesta poco irme.
- ☐ No me cuesta nada irme.

**7. Cuando estoy con el bebé disfruto:**

- ☐ Muy frecuentemente.
- ☐ Frecuentemente.
- ☐ Ocasionalmente.
- ☐ Muy raramente.
- ☐ Nunca.

**8. Cuando no estoy con el bebé, me doy cuenta de que pienso en él/ella:**

- ☐ Casi todo el tiempo.
- ☐ Muy frecuentemente.
- ☐ Frecuentemente.
- ☐ Ocasionalmente.
- ☐ Nunca.

**9. Cuando estoy con el bebé intento alargar el tiempo que estoy con él/ella:**

- ☐ Muy frecuentemente.
- ☐ Frecuentemente.
- ☐ Ocasionalmente.
- ☐ Muy raramente.
- ☐ Nunca.

**10. Cuando he estado un tiempo separado/a del bebé y estoy a punto de encontrarme con él/ella de nuevo, normalmente siento:**

- ☐ Placer intenso ante la idea.
- ☐ Placer moderado ante la idea.
- ☐ Leve placer ante la idea.
- ☐ Ningún sentimiento ante la idea.
- ☐ Sentimientos negativos ante la idea.

**11. En este momento pienso en el bebé como algo propio, como algo mío:**

- ☐ Completamente como MI bebé.
- ☐ Bastante como MI bebé.
- ☐ Algo como MI bebé.
- ☐ Un poco como MI bebé.
- ☐ Aún no lo siento como MI bebé.

**12. Respecto a las cosas que hemos tenido que dejar por causa del bebé:**

- ☐ Me arrepiento completamente.
- ☐ Me arrepiento bastante.
- ☐ Me arrepiento algo.
- ☐ Me arrepiento poco.
- ☐ No me arrepiento para nada.

**13. En los últimos 3 meses, he sentido que no tenía tiempo para mí misma o para hacer las cosas que me interesan:**

- ☐ Muy frecuentemente.
- ☐ Frecuentemente.
- ☐ Ocasionalmente.
- ☐ Muy raramente.
- ☐ Nunca.

**14. Confío en mi propio criterio para decidir lo que el bebé necesita:**

- ☐ Muy frecuentemente.
- ☐ Frecuentemente.
- ☐ Ocasionalmente.
- ☐ Muy raramente.
- ☐ Nunca.

**15. Normalmente cuando estoy con el bebé:**

- ☐ Soy muy impaciente.
- ☐ Soy bastante impaciente.
- ☐ Soy moderadamente impaciente.
- ☐ Soy ligeramente impaciente.
- ☐ No soy nada impaciente.
